# Supplementary material
Source: PubMed Central journal article supplement (PMC1948910)

**A.** Mock TrkC TrkC + BAF TrkC + DEVD

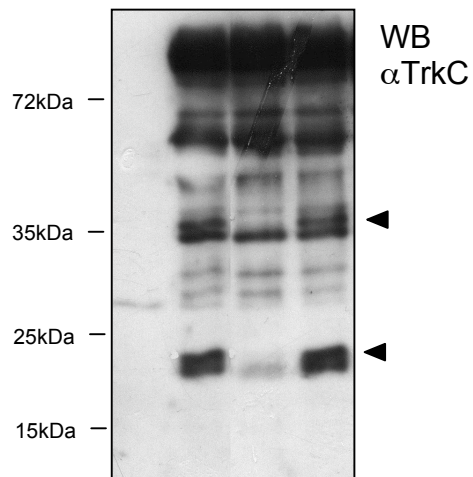

**B.** TrkC TrkC + Casp3DN TrkC D495N/D641N

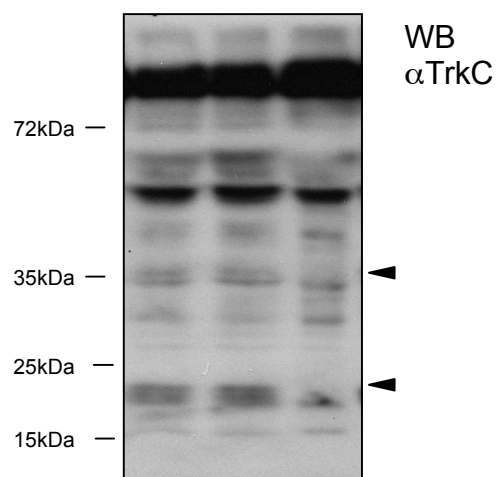

**C.** Mock ratTrkC ratTrkC D495N/D641N huTrkC huTrkC + BAF

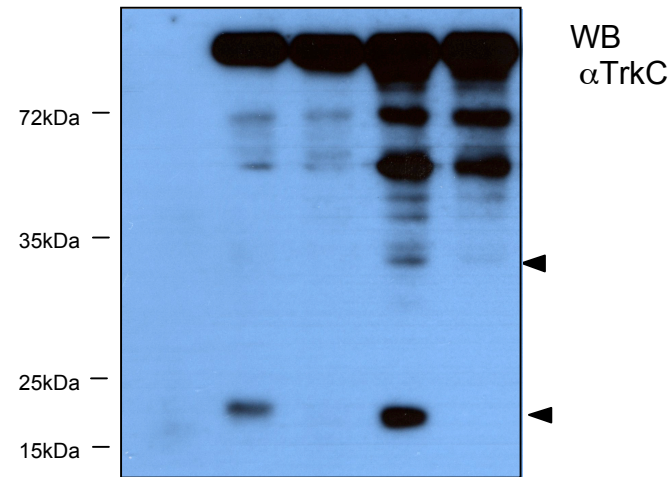

**D.** TrkC p75 TrkC + p75

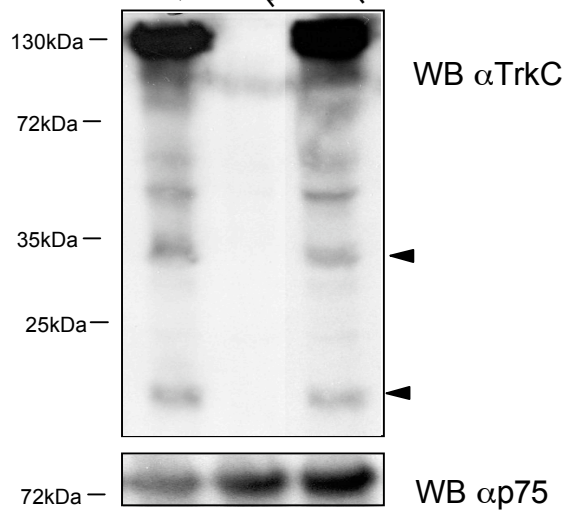

Supplement: pnas_0701243104_2.pdf [file pnas_0701243104_2.pdf]
