# Supplementary material
Source: PubMed Central journal article supplement (PMC1948910)

**A.** $\alpha$ HA-PE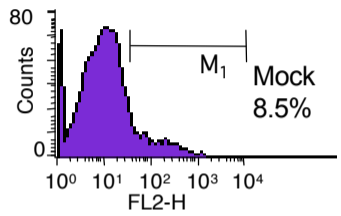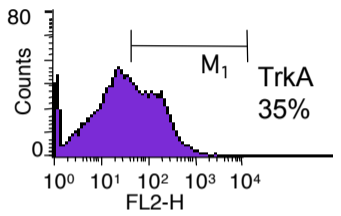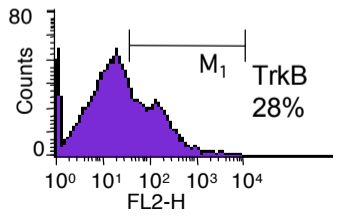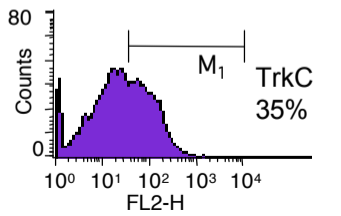**B.** $\alpha$ -ssDNA-FITC labeled cells (%)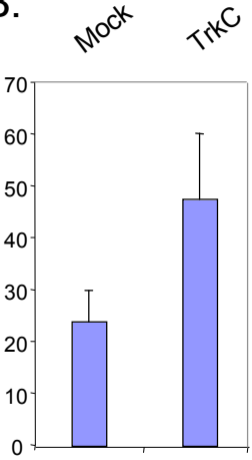**C.** $\alpha$ -ssDNA-FITC labeled cells (%)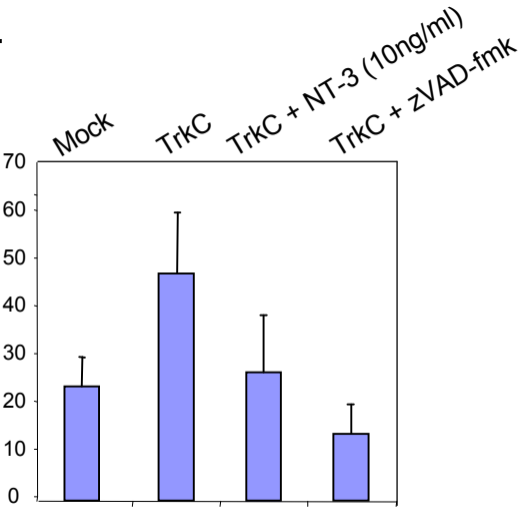

Supplement: pnas_0701243104_1.pdf [file pnas_0701243104_1.pdf]
